# Supplementary material for: A clinical scoring system to prioritise investigation for tuberculosis among adults attending HIV clinics in South Africa
Source: PLOS journal article supplement (doi:10.1371/journal.pone.0181519), 2017-08-03
Supplement: S1 (10.1371/journal.pone.0181519.s001) [file journal.pone.0181519.s001]

S1 Table. Characteristics of eligible participants and missing values (N=1065)

| Characteristic                                                                            |                     | Derivation dataset (N=525) |                            | Validation dataset (N=540) |                            |
|-------------------------------------------------------------------------------------------|---------------------|----------------------------|----------------------------|----------------------------|----------------------------|
|                                                                                           |                     | Value<br>N (%)             | Missing<br>values<br>N (%) | Value<br>N (%)             | Missing<br>values<br>N (%) |
| <b>Demographics</b>                                                                       |                     |                            |                            |                            |                            |
| <b>Age, years</b>                                                                         | Median (IQR)        | 41 (34,48)                 | 0                          | 41 (34,48)                 | 0                          |
| <b>Sex</b>                                                                                | Female              | 353 (67.2)                 | 0                          | 382 (70.7)                 | 0                          |
| <b>Alcohol history</b>                                                                    | Never <sup>1</sup>  | 315 (60)                   | 0                          | 360 (66.7)                 | 0                          |
| <b>Smoking history</b>                                                                    | Never <sup>2</sup>  | 361 (68.8)                 | 0                          | 389 (72.0)                 | 0                          |
| <b>HIV/TB history</b>                                                                     |                     |                            |                            |                            |                            |
| <b>Participant category</b>                                                               | On ART <sup>3</sup> | 377 (71.8)                 | 0                          | 387 (71.7)                 | 0                          |
| <b>Duration since HIV diagnosed, months</b>                                               | Median (IQR)        | 56 (21,95)                 | 10 (2)                     | 51 (6,97)                  | 2 (0.4)                    |
| <b>Duration on ART, months</b>                                                            | Median (IQR)        | 55 (26,85)                 | 1/377(0.3)                 | 51 (28,83)                 | 0                          |
| <b>Ever had IPT</b>                                                                       | Yes                 | 51 (9.7)                   | 0                          | 19 (3.5)                   | 0                          |
| <b>Ever had CPT</b>                                                                       | Yes                 | 378 (72.0)                 | 0                          | 360 (66.7)                 | 0                          |
| <b>Previous TB treatment</b>                                                              | Yes                 | 205 (39.1)                 | 0                          | 202 (37.4)                 | 0                          |
| <b>WHO symptoms at enrolment</b>                                                          |                     |                            |                            |                            |                            |
|                                                                                           | Cough               | 308 (58.7)                 | 0                          | 354 (65.6)                 | 0                          |
|                                                                                           | Weight loss         | 238/524(45.4)              | 1 (0.2)                    | 224 (41.5)                 | 0                          |
|                                                                                           | Night sweats        | 133 (25.3)                 | 0                          | 132 (24.4)                 | 0                          |
|                                                                                           | Fever               | 99 (18.9)                  | 0                          | 89 (16.5)                  | 0                          |
| <b>Number of symptoms</b>                                                                 |                     | 1 (1,2)                    | 0                          | 1 (1,2)                    | 0                          |
| <b>Duration of WHO symptoms<sup>4</sup>, days</b>                                         | Median (IQR)        | 30 (8,94)                  | 5 (1)                      | 28 (7,84)                  | 4 (0.7)                    |
| <b>CD4 / BMI at enrolment</b>                                                             |                     |                            |                            |                            |                            |
| <b>CD4, cells/mm<sup>3</sup></b>                                                          | Median (IQR)        | 379 (228,543)              | 2 (0.4)                    | 335(168,559)               | 1 (0.2)                    |
| <b>Time from CD4 to enrolment, days</b>                                                   | Median (IQR)        | 147 (43,259)               | 2 (0.4)                    | 118 (27,267)               | 6 (1)                      |
| <b>BMI, kg/m<sup>2</sup></b>                                                              | Median (IQR)        | 24.0(20.6,28.5)            | 1 (0.2)                    | 24.1(20.3,28.4)            | 2 (0.4)                    |
| <b>TB diagnoses</b>                                                                       |                     |                            |                            |                            |                            |
|                                                                                           | Total               | 52 (9.9)                   | 0                          | 60 (11.1)                  | 0                          |
|                                                                                           | Confirmed TB        | 36 (6.9)                   | 0                          | 41 (7.6)                   | 0                          |
|                                                                                           | Clinical TB         | 16 (3.1)                   | 0                          | 19 (3.5)                   | 0                          |
| <b>Time from enrolment to TB diagnosis <sup>5</sup>, days</b>                             | Median (IQR)        | 7 (0,31)                   | 0                          | 13 (0,83)                  | 1 (0.2)                    |
| <b>Follow up</b>                                                                          |                     |                            |                            |                            |                            |
| <b>Time from enrolment to most recent of last study / clinic <sup>6</sup> visit, days</b> | Median (IQR)        | 281 (203,347)              | 1 (0.2)                    | 181 (133,231)              | 1 (0.2)                    |
| <b>Alive 6 months after enrolment <sup>7</sup></b>                                        | Yes                 | 487 (98)<br>(N=497)        | 28 (5.3)                   | 469 (98)<br>(N=479)        | 61(11.3)                   |

<sup>1</sup> compared with any alcohol in last 1 year; <sup>2</sup> compared with ever/ex-smoker; <sup>3</sup> compared with pre-ART group; <sup>4</sup> duration WHO tool positive; <sup>5</sup> defined as earliest of positive TB test or date TB treatment started; <sup>6</sup> Most recent clinic visit at time of clinic file review;

<sup>7</sup> Amongst participants with most recent study/clinic visit <6 months from enrolment, if participant had valid South African ID number and demise not reported by Department of home affairs / participant-nominated contacts / clinic staff within 6 months of enrolment, participant assumed to be alive at 6 months after enrolment.

IPT=isoniazid preventive therapy; CPT=cotrimoxazole preventive therapy
